# Supplementary material for: Proton transfer anionic polymerization with C–H bond as dormant species
Source: Research Square preprint supplement (doi:10.21203/rs.3.rs-3589509/v1), 2023-11-28
Supplement: Supplementary file 1 [file b55cbc9579710c9c5abc4d2b.pdf]

## *Supplementary Information*

### **Proton transfer anionic polymerization with C–H bonds as dormant species**

Mineto Uchiyama\*, Natsumi Ohira, Konomi Yamashita, Katsutoshi Sagawa, Masami Kamigaito\*

*Department of Molecular and Macromolecular Chemistry, Graduate School of Engineering, Nagoya University, Furo-cho, Chikusa-ku, Nagoya 464-8603, Japan*

*e-mail: uchiyama@chembio.nagoya-u.ac.jp, kamigait@chembio.nagoya-u.ac.jp*

#### **Contents:**

|                                    |     |
|------------------------------------|-----|
| <b>Supplementary Methods</b> ..... | S3  |
| <b>Supplementary Table 1</b> ..... | S6  |
| <b>Supplementary Table 2</b> ..... | S6  |
| <b>Supplementary Table 3</b> ..... | S6  |
| <b>Supplementary Table 4</b> ..... | S7  |
| <b>Supplementary Fig. 1</b> .....  | S8  |
| <b>Supplementary Fig. 2</b> .....  | S9  |
| <b>Supplementary Fig. 3</b> .....  | S9  |
| <b>Supplementary Fig. 4</b> .....  | S10 |
| <b>Supplementary Fig. 5</b> .....  | S10 |
| <b>Supplementary Fig. 6</b> .....  | S11 |
| <b>Supplementary Fig. 7</b> .....  | S12 |
| <b>Supplementary Fig. 8</b> .....  | S12 |
| <b>Supplementary Fig. 9</b> .....  | S13 |
| <b>Supplementary Fig. 10</b> ..... | S13 |
| <b>Supplementary Fig. 11</b> ..... | S14 |
| <b>Supplementary Fig. 12</b> ..... | S14 |
| <b>Supplementary Fig. 13</b> ..... | S15 |
| <b>Supplementary Fig. 14</b> ..... | S15 |
| <b>Supplementary Fig. 15</b> ..... | S16 |
| <b>Supplementary Fig. 16</b> ..... | S16 |
| <b>Supplementary Fig. 17</b> ..... | S17 |
| <b>Supplementary Fig. 18</b> ..... | S18 |
| <b>Supplementary Fig. 19</b> ..... | S18 |
| <b>Supplementary Fig. 20</b> ..... | S19 |
| <b>Supplementary Fig. 21</b> ..... | S19 |

|                                    |     |
|------------------------------------|-----|
| <b>Supplementary Fig. 22</b> ..... | S20 |
| <b>Supplementary Fig. 23</b> ..... | S20 |
| <b>Supplementary Fig. 24</b> ..... | S21 |
| <b>Supplementary Fig. 25</b> ..... | S21 |
| <b>Supplementary Fig. 26</b> ..... | S22 |
| <b>Supplementary Fig. 27</b> ..... | S22 |

## Supplementary Methods

**Synthesis of cumyl isobutyrate (2).** Cumyl isobutyrate (**2**) was synthesized via a reaction between isobutyric anhydride and 2-phenyl-2-propanol. Isobutyric anhydride (7.37 mL, 44.3 mmol) was added to a mixture of 2-phenyl-2-propanol (5.48 g, 40.2 mmol) and DMAP (51.9 mg, 0.425 mmol). After stirring at 100 °C for 23 h, the reaction was quenched by cooling the solution to 0 °C. The quenched solution was diluted with Et<sub>2</sub>O and washed with a saturated aqueous Na<sub>2</sub>CO<sub>3</sub> solution and distilled water. The solvent was removed by evaporation to give the crude product. After purification by column chromatography on silica gel with *n*-hexane/Et<sub>2</sub>O (95/5) as the eluent, **2** was obtained as a pale-yellow solid (5.34 g, 25.9 mmol, 64% yield). <sup>1</sup>H NMR (CDCl<sub>3</sub>, r.t.): δ 1.15 (d, 6H, (CH<sub>3</sub>)<sub>2</sub>CH, *J* = 6.9 Hz), 1.76 (s, 6H, OC(CH<sub>3</sub>)<sub>2</sub>C<sub>6</sub>H<sub>5</sub>), 2.53 (sept, 1H, (CH<sub>3</sub>)<sub>2</sub>CH, *J* = 6.9 Hz), and 7.20–7.38 (m, 5H, C<sub>6</sub>H<sub>5</sub>) (fig. S23A). <sup>13</sup>C NMR (CDCl<sub>3</sub>, r.t.): δ 19.00 ((CH<sub>3</sub>)<sub>2</sub>CH), 28.60 (OC(CH<sub>3</sub>)<sub>2</sub>C<sub>6</sub>H<sub>5</sub>), 34.80 ((CH<sub>3</sub>)<sub>2</sub>CH), 80.90 (OC(CH<sub>3</sub>)<sub>2</sub>C<sub>6</sub>H<sub>5</sub>), 124.1 (Ar-C2), 126.9 (Ar-C4), 128.2 (Ar-C3), 146.1 (Ar-C1), and 175.6 (C(O)O) (fig. S23B).

**Synthesis of vinyloxyethyl isobutyrate (5).** Vinyloxyethyl isobutyrate (**5**) was synthesized via a reaction between isobutyryl chloride and ethylene glycol monovinyl ether. Isobutyryl chloride (10.0 mL, 100 mmol) was added dropwise to a mixture of ethylene glycol monovinyl ether (9.20 mL, 95.2 mmol), triethyl amine (13.8 mL, 100 mmol), and THF (30 mL) at 0 °C. The reaction mixture was gradually warmed to 20 °C. After stirring for 4 h, the reaction was quenched by cooling the solution to 0 °C. The quenched solution was diluted with Et<sub>2</sub>O and washed with distilled water. The solvent was removed by evaporation to give the crude product. After purification by distillation (175 Pa, 126 °C), **5** was obtained as a colorless liquid (4.76 g, 30.0 mmol, 32% yield). <sup>1</sup>H NMR (CDCl<sub>3</sub>, r.t.): δ 1.18 (d, 6H, (CH<sub>3</sub>)<sub>2</sub>CH-, *J* = 6.8 Hz), 2.59 (sept, 1H, (CH<sub>3</sub>)<sub>2</sub>CH-, *J* = 6.8 Hz), 3.89 (t, 2H, CH<sub>2</sub>=CHOCH<sub>2</sub>, *J* = 4.6 Hz), 4.04 (dd, 1H, CH<sub>2</sub>=CH, *J*<sub>gem</sub> = 2.4 Hz and *J*<sub>vic</sub> = 6.8 Hz), 4.21 (dd, 1H, CH<sub>2</sub>=CH, *J*<sub>gem</sub> = 2.4 Hz and *J*<sub>vic</sub> = 14.4 Hz), 4.31 (t, 2H, CH<sub>2</sub>OC(O)C(CH<sub>3</sub>)<sub>2</sub>, *J* = 4.8 Hz), and 6.48 (dd, 1H, CH<sub>2</sub>=CH, *J* = 6.8 Hz *J* = 14.4 Hz) (fig. S24A). <sup>13</sup>C NMR (CDCl<sub>3</sub>, r.t.): δ: 18.97 (CHCH<sub>3</sub>), 33.85 (CH(CH<sub>3</sub>)<sub>2</sub>), 62.50 (C(O)OCH<sub>2</sub>), 65.83 (C=CHOCH<sub>2</sub>-), 86.94 (CH<sub>2</sub>=CH), 151.5 (CH<sub>2</sub>=CH), and 177.1 (C=O) (fig. S24B).

**Synthesis of 2-(tert-butyldimethylsiloxy)ethyl isobutyrate (6).** 2-(tert-Butyldimethylsiloxy)ethyl isobutyrate (**6**) was synthesized by the following procedure. 2-Hydroxyethyl isobutyrate was first synthesized by a reaction between isobutyric acid and ethylene glycol. H<sub>2</sub>SO<sub>4</sub> (1.00 mL, 18.7 mmol) was added to the mixture of isobutyric acid (10.5 mL, 112 mmol) and ethylene glycol (62 mL, 1.12 mol). The reaction mixture was heated to 80 °C. After 4 h, the reaction was quenched by cooling the solution to room

temperature. The solution was diluted with  $\text{CH}_2\text{Cl}_2$  and washed with saturated aqueous  $\text{Na}_2\text{CO}_3$  solution and distilled water. The solvent was removed by evaporation to give crude 2-hydroxyethyl isobutyrate (6.95 g, 52.6 mmol, 47% yield). Then, the hydroxy group was protected with *tert*-butyldimethylsilyl chloride. Crude 2-hydroxyethyl isobutyrate (6.95 g, 52.6 mmol) was added dropwise to a mixture of *tert*-butyldimethylsilyl chloride (7.56 g, 50.2 mmol), triethylamine (7.60 mL, 54.8 mmol), and  $\text{CH}_2\text{Cl}_2$  (4.0 mL) at 0 °C. The reaction mixture was gradually warmed to 20 °C. After stirring for 4 h, the product was extracted with  $\text{CH}_2\text{Cl}_2$  and washed with saturated aqueous  $\text{Na}_2\text{CO}_3$  solution and distilled water. The solvent was removed by evaporation to give the crude product. After purification by column chromatography on silica gel with *n*-hexane/ $\text{Et}_2\text{O}$  (20/1) as the eluent, **6** was obtained as a colorless liquid (1.61 g, 6.53 mmol, 13% yield).  $^1\text{H}$  NMR ( $\text{CDCl}_3$ , r.t.):  $\delta$  0.08 (s, 6H, - $\text{Si}(\text{CH}_3)_2$ -), 0.9 (s, 9H, - $\text{Si}(\text{CH}_3)_2\text{C}(\text{CH}_3)_2$ ), 1.18 (d, 6H,  $(\text{CH}_3)_2\text{CH}$ -,  $J = 6.8$  Hz), 2.57 (sept, 1H,  $(\text{CH}_3)_2\text{CH}$ -,  $J = 6.8$  Hz), 3.81 (t, 2H, - $\text{COOCH}_2$ -,  $J = 5.2$  Hz), and 4.14 (t, 2H, - $\text{CH}_2\text{OSi}$ -,  $J = 5.2$  Hz) (fig. S25A).  $^{13}\text{C}$  NMR ( $\text{CDCl}_3$ , r.t.):  $\delta$  -5.31 (- $\text{Si}(\text{CH}_3)_2$ ), 18.34 (- $\text{SiC}(\text{CH}_3)_3$ ), 19.05 (- $\text{CH}(\text{CH}_3)_2$ ), 25.86 (- $\text{SiC}(\text{CH}_3)_3$ ), 34.00 (- $\text{CH}(\text{CH}_3)_2$ ), 61.30 (- $\text{CH}_2\text{OSi}$ -), 65.58 ( $\text{COOCH}_2$ -), and 177.1 ( $\text{C}=\text{O}$ ) (fig. S25B).

**Synthesis of 1,3,5-cyclohexanetriol triisobutyrate (7).** 1,3,5-Cyclohexanetriol triisobutyrate (**7**) was synthesized by a reaction between isobutyric chloride and 1,3,5-cyclohexanetriol. Isobutyryl chloride (16.0 mL, 151 mmol) was added dropwise to a mixture of 1,3,5-cyclohexanetriol (1.50 g, 11.3 mmol), DMAP (0.214 g, 1.70 mmol), pyridine (12.7 mL, 158 mmol), and 1,4-dioxane (30 mL) at 0 °C. The reaction mixture was gradually warmed to 20 °C. After stirring for 2 h, the reaction mixture was heated to 50 °C. After 20 h, the reaction was quenched by cooling the solution to room temperature. The quenched solution was diluted with  $\text{CHCl}_3$  and washed with 1 N NaOH aqueous solution. The solvent was removed by evaporation to give the crude product. After purification by column chromatography on silica gel with *n*-hexane/ $\text{EtOAc}$  (9/1) as the eluent, **7** was obtained as a white solid (1.23 g, 3.59 mmol, 32% yield).  $^1\text{H}$  NMR ( $\text{CDCl}_3$ , r.t.):  $\delta$  1.14-1.91 (m, 18H,  $(\text{CH}_3)_2\text{CH}$ -), 1.41-1.47, 1.52-1.62 (m, 3H, - $\text{CH}_{a2}$ -), 2.07-2.12, 2.28-2.24 (m, 3H, - $\text{CH}_{e2}$ -), 2.45-2.61 (m, 2H,  $(\text{CH}_3)_2\text{CH}$ -), 4.76-4.84, 5.06-5.13, and 5.28-5.32 (m, 3H, - $\text{OCH}$ -) (fig. S26A).  $^{13}\text{C}$  NMR ( $\text{CDCl}_3$ , r.t.):  $\delta$  18.92 (- $\text{CH}(\text{CH}_3)_2$ ), 33.97-34.08 and 34.79 (- $\text{CH}(\text{CH}_3)_2$ ), 36.22 (- $\text{CH}_2$ -), 36.44 (- $\text{CH}_2$ -), 66.62, 67.08, 67.63 (- $\text{OCH}$ -), and 176.0-176.2 ( $\text{C}=\text{O}$ ) (fig. S26B).

**Synthesis of the HCl adduct of 5.** The HCl adduct of **5** was synthesized by bubbling dry HCl gas through a solution of **5** in *n*-hexane. The HCl gas was generated by adding concentrated  $\text{H}_2\text{SO}_4$  dropwise to NaCl powder and was dried by passing through concentrated  $\text{H}_2\text{SO}_4$  and a column packed with  $\text{CaCl}_2$ . The dehydrated HCl gas was bubbled into a mixture of **5** (7.91 g,



50 mmol) and *n*-hexane (43 mL) at  $-78\text{ }^{\circ}\text{C}$ . After HCl bubbling for 30 min,  $\text{N}_2$  gas was bubbled for 30 min to remove the excess HCl gas. After the reaction solution was gradually warmed to  $0\text{ }^{\circ}\text{C}$ ,  $\text{N}_2$  gas was bubbled for another 30 min. Quantitative formation of the product was confirmed by  $^1\text{H}$  NMR spectroscopy. The concentration of the product was measured by  $^1\text{H}$  NMR spectroscopy with an *n*-hexane solution of EtOAc with a known concentration.  $^1\text{H}$  NMR ( $(\text{CD}_3)_2\text{CO}$ , r.t.):  $\delta$  1.22 (d, 6H,  $(\text{CH}_3)_2\text{CHC}(\text{O})$ ,  $J = 6.8\text{ Hz}$ ), 1.77 (d, 3H,  $\text{CH}_3\text{CHCl}$ ,  $J = 5.6\text{ Hz}$ ), 2.56 (sept, 1H,  $(\text{CH}_3)_2\text{CHC}(\text{O})$ ,  $J = 6.8\text{ Hz}$ ), 3.72 and 4.06 (m, 2H,  $\text{OCH}_2\text{CH}_2\text{OC}(\text{O})$ ), 4.20 and 4.30 (m, 2H,  $\text{C}(\text{O})\text{OCH}_2\text{CH}_2\text{O}$ ), and 5.70 (q, 1H,  $\text{CH}_3\text{CHCl}(\text{OCH}_2-)$ ,  $J = 5.6\text{ Hz}$ ) (fig. S27).

**Supplementary Table 1. Effects of CTAs on anionic polymerization of TBMA<sup>a</sup>**

| entry          | CTA      | [M] <sub>0</sub> /[CTA] <sub>0</sub> | time   | conv. (%) <sup>b</sup> | <i>M<sub>n</sub></i> (calcd) <sup>c</sup> | <i>M<sub>n</sub></i> <sup>d</sup> | <i>Đ</i> <sup>d</sup> |
|----------------|----------|--------------------------------------|--------|------------------------|-------------------------------------------|-----------------------------------|-----------------------|
| 1              | none     | —                                    | 10 min | >99                    | —                                         | 55700                             | 1.96                  |
| 2              | <b>1</b> | 25                                   | 1 h    | >99                    | 3700                                      | 5300                              | 1.23                  |
| 3 <sup>e</sup> | <b>1</b> | 50                                   | 1 h    | >99                    | 7200                                      | 10200                             | 1.27                  |
| 4 <sup>f</sup> | <b>1</b> | 100                                  | 1 h    | >99                    | 14300                                     | 16400                             | 1.32                  |
| 5              | <b>2</b> | 25                                   | 2 min  | 99                     | 3800                                      | 4400                              | 1.18                  |
| 6              | <b>3</b> | 25                                   | 1 h    | >99                    | 3800                                      | 4800                              | 1.19                  |
| 7              | <b>4</b> | 25                                   | 30 min | >99                    | 3700                                      | 4700                              | 1.25                  |

<sup>a</sup>Polymerization condition: [M]<sub>0</sub>/[CTA]<sub>0</sub>/[KHMDs]<sub>0</sub>/[18-crown-6]<sub>0</sub> = 750/30/3/3.3 mM in THF at 0 °C. <sup>b</sup>Determined by gravimetric analysis. <sup>c</sup>*M<sub>n</sub>*(calcd) = MW(TBMA) × conv. + MW(CTA). <sup>d</sup>Determined by SEC. <sup>e</sup>[M]<sub>0</sub>/[CTA]<sub>0</sub>/[KHMDs]<sub>0</sub>/[18-crown-6]<sub>0</sub> = 750/15/1.5/1.65 mM. <sup>f</sup>[M]<sub>0</sub>/[CTA]<sub>0</sub>/[KHMDs]<sub>0</sub>/[18-crown-6]<sub>0</sub> = 750/7.5/0.75/0.88 mM.

**Supplementary Table 2. Effect of base catalysts on anionic polymerization of TBMA<sup>a</sup>**

| entry          | base catalyst | additive   | time    | conv. (%) <sup>b</sup> | <i>M<sub>n</sub></i> (calcd) <sup>c</sup> | <i>M<sub>n</sub></i> <sup>d</sup> | <i>Đ</i> <sup>d</sup> |
|----------------|---------------|------------|---------|------------------------|-------------------------------------------|-----------------------------------|-----------------------|
| 1              | LiHMDS        | 12-crown-4 | 3 min   | >99                    | 3800                                      | 721400                            | 1.67                  |
| 2              | NaHMDS        | 15-crown-5 | 10 min  | >99                    | 3800                                      | 59700                             | 1.30                  |
| 3              | KHMDS         | 18-crown-6 | 2 min   | >99                    | 3800                                      | 4400                              | 1.18                  |
| 4              | KOtBu         | 18-crown-6 | 2.5 min | >99                    | 3800                                      | 4200                              | 1.18                  |
| 5 <sup>e</sup> | KH            | 18-crown-6 | 16 h    | >99                    | 3700                                      | 4500                              | 1.38                  |
| 6              | KHMDS         | none       | 2 min   | >99                    | 3800                                      | 4900                              | 1.59                  |

<sup>a</sup>Polymerization condition: [M]<sub>0</sub>/[**2**]<sub>0</sub>/[base catalyst]<sub>0</sub>/[additive]<sub>0</sub> = 750/30/3/3.3 or 0 mM in THF at 0 °C. <sup>b</sup>Determined by gravimetric analysis. <sup>c</sup>*M<sub>n</sub>*(calcd) = MW(TBMA) × conv. + MW(CTA). <sup>d</sup>Determined by SEC. <sup>e</sup>**4** was used in place of **2**.

**Supplementary Table 3. Anionic polymerization of TBMA under various conditions<sup>a</sup>**

| entry          | solvent           | temp. (°C) | [M] <sub>0</sub> /[CTA] <sub>0</sub> | time   | conv. (%) <sup>b</sup> | <i>M<sub>n</sub></i> (calcd) <sup>c</sup> | <i>M<sub>n</sub></i> <sup>d</sup> | <i>Đ</i> <sup>d</sup> |
|----------------|-------------------|------------|--------------------------------------|--------|------------------------|-------------------------------------------|-----------------------------------|-----------------------|
| 1              | THF               | 0          | 25                                   | 10 min | >99                    | 3700                                      | 4500                              | 1.13                  |
| 2              | toluene/THF (9/1) | 0          | 25                                   | 10 min | >99                    | 3700                                      | 4500                              | 1.10                  |
| 3 <sup>e</sup> | toluene/THF (9/1) | 0          | 10                                   | 15 min | >99                    | 1600                                      | 2100                              | 1.14                  |
| 4 <sup>f</sup> | toluene/THF (9/1) | 0          | 50                                   | 1 h    | >99                    | 7200                                      | 8700                              | 1.16                  |
| 5 <sup>g</sup> | toluene/THF (9/1) | 0          | 100                                  | 1 h    | >99                    | 14400                                     | 15400                             | 1.40                  |
| 6              | toluene/THF (9/1) | −78        | 25                                   | 10 min | >99                    | 3700                                      | 4200                              | 2.12                  |
| 7              | toluene/THF (9/1) | −40        | 25                                   | 10 min | >99                    | 3700                                      | 4300                              | 1.38                  |
| 8              | toluene/THF (9/1) | 10         | 25                                   | 10 min | >99                    | 3700                                      | 4200                              | 1.12                  |
| 9              | toluene/THF (9/1) | 20         | 25                                   | 1 min  | >99                    | 3700                                      | 4400                              | 1.09                  |

<sup>a</sup> Polymerization condition: [M]<sub>0</sub>/[**4**]<sub>0</sub>/[KOtBu]<sub>0</sub>/[18-crown-6]<sub>0</sub> = 750/30/3/3.3 mM in THF at 0 °C. <sup>b</sup>Determined by gravimetric analysis. <sup>c</sup>*M<sub>n</sub>*(calcd) = MW(TBMA) × conv. + MW(**4**). <sup>d</sup>Determined by SEC. <sup>e</sup>[M]<sub>0</sub>/[**4**]<sub>0</sub>/[KOtBu]<sub>0</sub>/[18-crown-6]<sub>0</sub> = 750/75/7.5/8.25 mM. <sup>f</sup>[M]<sub>0</sub>/[**4**]<sub>0</sub>/[KHMDs]<sub>0</sub>/[18-crown-6]<sub>0</sub> = 750/15/1.5/1.65 mM. <sup>g</sup>[M]<sub>0</sub>/[**4**]<sub>0</sub>/[KOtBu]<sub>0</sub>/[18-crown-6]<sub>0</sub> = 750/7.5/0.75/0.88 mM.

**Supplementary Table 4. Effects of *t*BuOH on anionic polymerization of TBMA<sup>a</sup>**

| entry | [ <i>t</i> BuOH] <sub>0</sub> /[KO <i>t</i> Bu] <sub>0</sub> | time    | conv. (%) <sup>b</sup> | <i>M</i> <sub>n</sub> (calcd) <sup>c</sup> | <i>M</i> <sub>n</sub> <sup>d</sup> | <i>Đ</i> <sup>d</sup> |
|-------|--------------------------------------------------------------|---------|------------------------|--------------------------------------------|------------------------------------|-----------------------|
| 1     | 0                                                            | 4 sec   | 86                     | 3300                                       | 3500                               | 1.24                  |
| 2     | 0                                                            | 2.5 min | >99                    | 3800                                       | 4200                               | 1.18                  |
| 3     | 1                                                            | 2 min   | 83                     | 3200                                       | 3500                               | 1.27                  |
| 4     | 1                                                            | 10 min  | 94                     | 3500                                       | 3400                               | 1.28                  |
| 5     | 2                                                            | 2 min   | 53                     | 2100                                       | 2100                               | 1.35                  |
| 6     | 2                                                            | 3 h     | >99                    | 3800                                       | 4500                               | 1.20                  |
| 7     | 3                                                            | 2 min   | 19                     | 900                                        | 1000                               | 1.36                  |
| 8     | 3                                                            | 1 h     | 81                     | 3100                                       | 3100                               | 1.22                  |

<sup>a</sup>Polymerization condition: [M]<sub>0</sub>/[**2**]<sub>0</sub>/[KO*t*Bu]<sub>0</sub>/[18-crown-6]<sub>0</sub>/[*t*-BuOH]<sub>0</sub> = 750/30/3.0/3.3/0-9.0 mM in THF at 0 °C.

<sup>b</sup>Determined by gravimetric analysis. <sup>c</sup>*M*<sub>n</sub>(calcd) = MW(TBMA) × conv. + MW(**2**). <sup>d</sup>Determined by SEC.



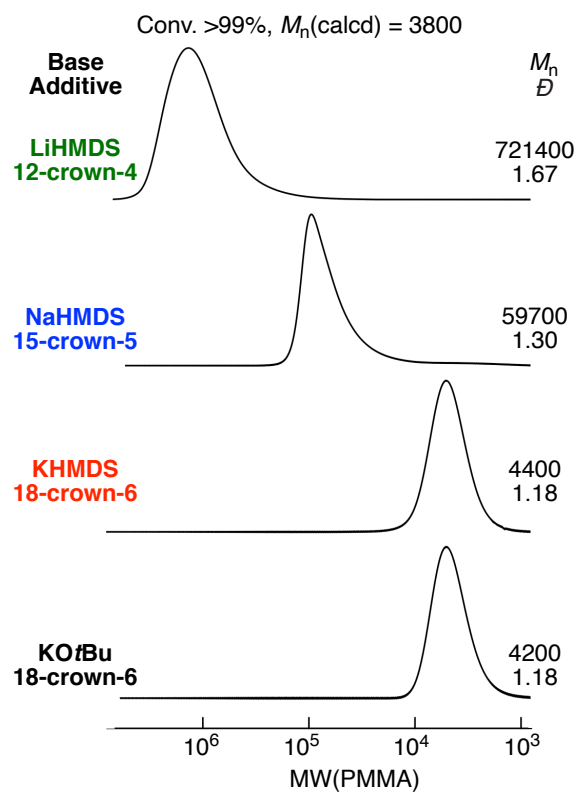

**Supplementary Fig. 2.** Effect of base catalyst on anionic polymerization of TBMA in the presence of **2**:  $[M]_0/[2]_0/[base\ catalyst]_0/[additive]_0 = 750/30/3.0/3.3$  mM in THF at 0 °C.

### Reversible Chain Transfer

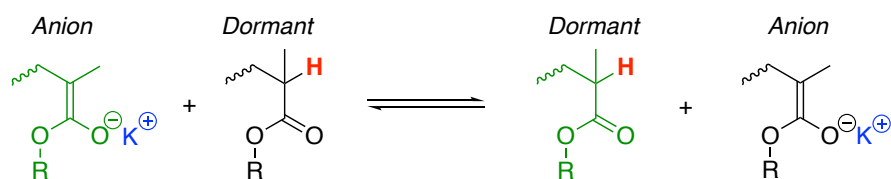

### Reversible Termination

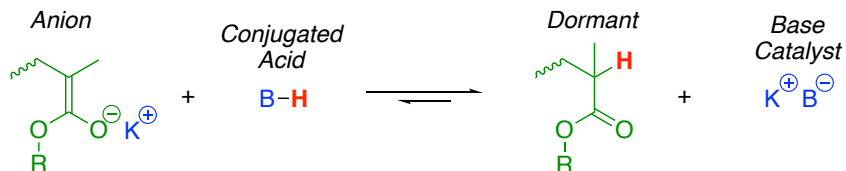

**Supplementary Fig. 3.** Reversible chain transfer and reversible termination for controlling anionic polymerization.

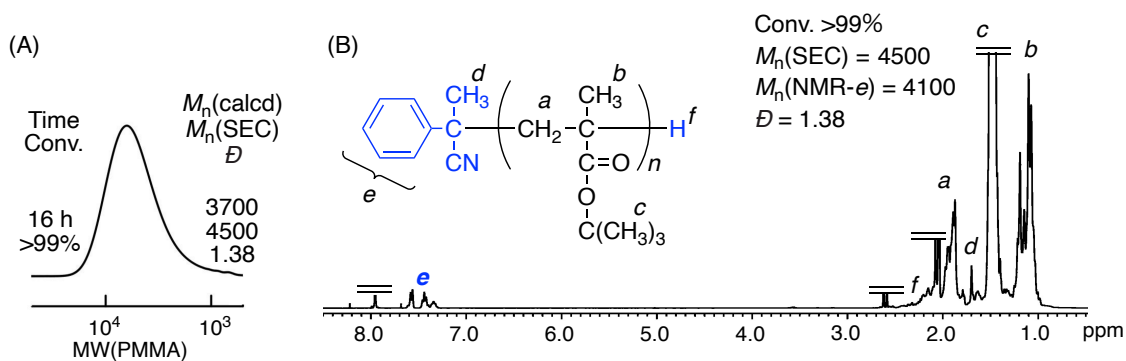

**Supplementary Fig. 4.** SEC curve (A) and  $^1\text{H}$  NMR spectrum ( $(\text{CD}_3)_2\text{CO}$ , 55 °C) (B) of poly(TBMA) obtained by anionic polymerization of TBMA using KH in the presence of **4**:  $[\text{M}]_0/[\textbf{4}]_0/[\text{KH}]_0/[\text{18-crown-6}]_0 = 750/30/3/3.3$  mM in THF at 0 °C.

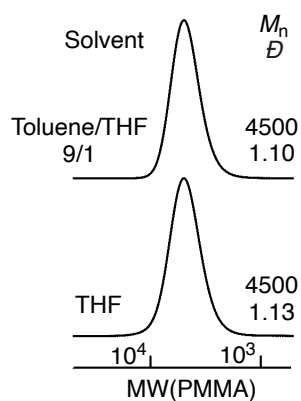

**Supplementary Fig. 5.** Effect of solvent on anionic polymerization of TBMA using **4**:  $[\text{M}]_0/[\textbf{4}]_0/[\text{KO}t\text{Bu}]_0/[\text{18-crown-6}]_0 = 750/30/3.0/3.3$  mM in toluene/THF (9/1 v/v) or THF at 0 °C.

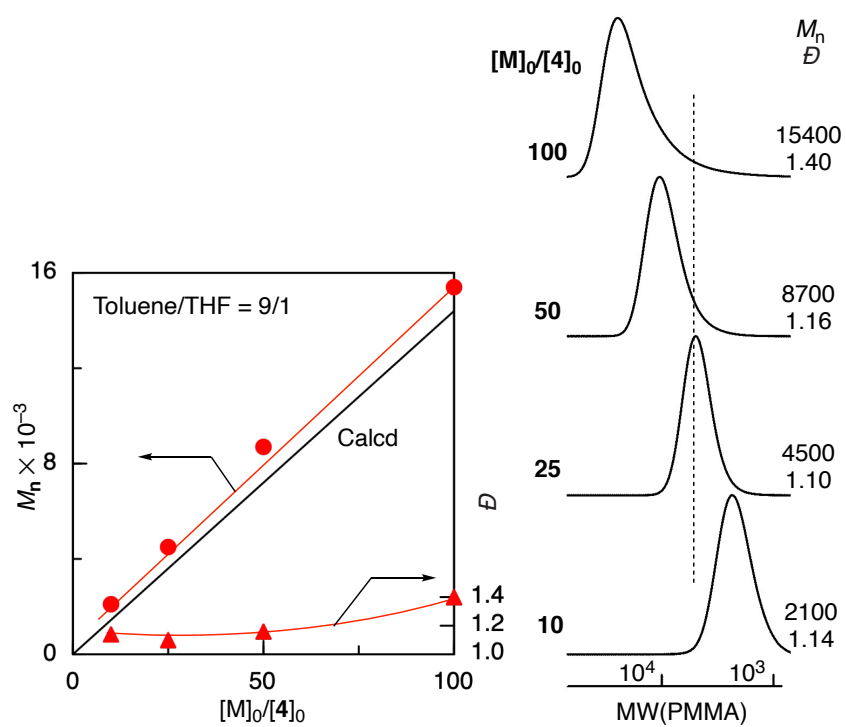

**Supplementary Fig. 6.** Effect of  $[M]_0/[4]_0$  on anionic polymerization of TBMA:  
 $[M]_0/[4]_0/[KOtBu]_0/[18\text{-crown-}6]_0 = 750/30/3.0/3.3$  mM in toluene/THF (9/1 v/v) at 0 °C.

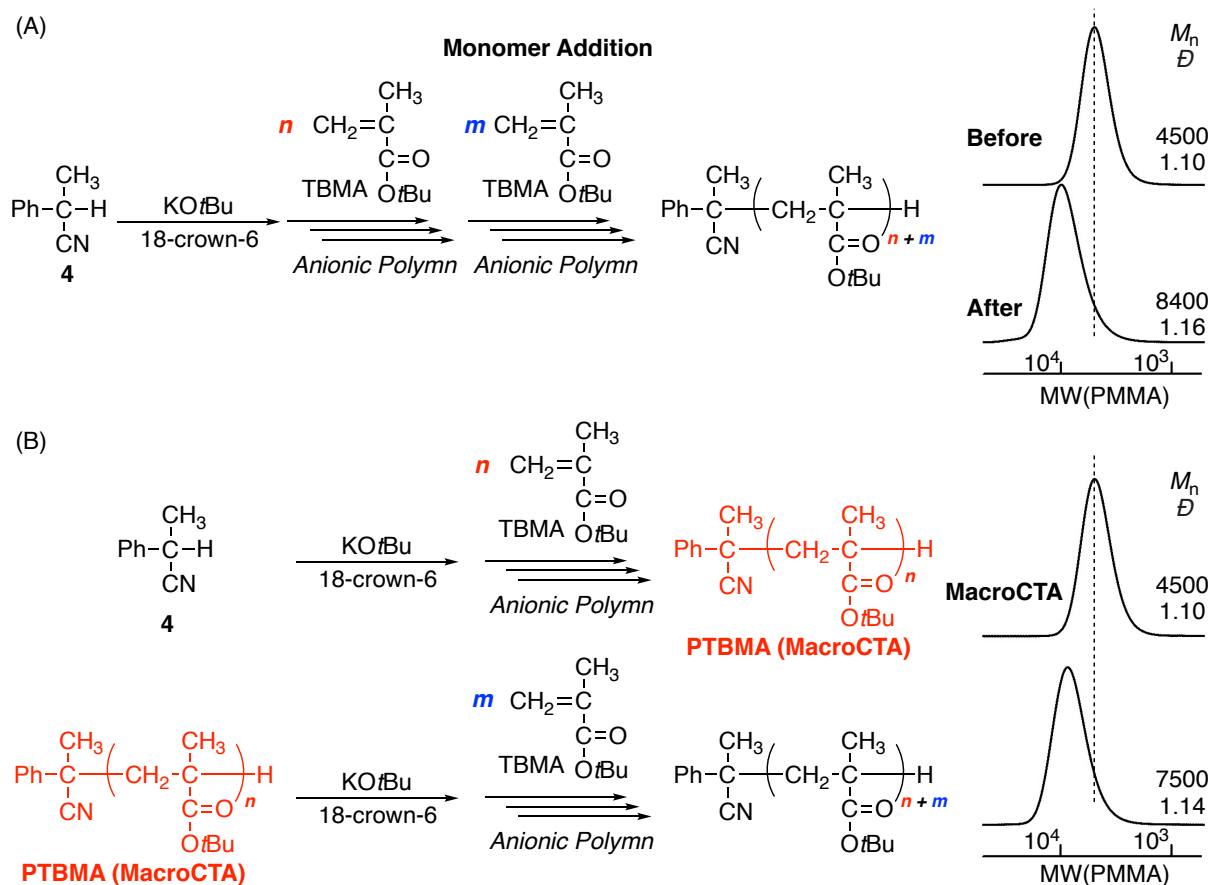

**Supplementary Fig. 7.** Monomer addition experiment (A) and chain-extension reaction using isolated polymer as macroCTA (B):  $[M]_0/[M]_{add}/[4]_0/[KOtBu]_0/[18\text{-crown-}6]_0 = 750/750/30/3.0/3.3$  mM in THF at 0 °C (A),  $[M]_0/[4]_0$  or  $[\text{macroCTA}]_0/[KOtBu]_0/[18\text{-crown-}6]_0 = 750/30/3.0/3.3$  mM in THF at 0 °C (B).

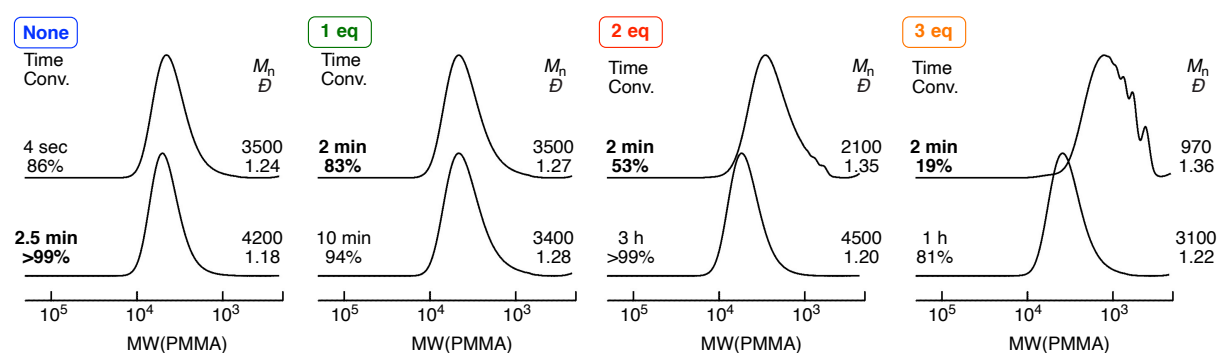

**Supplementary Fig. 8.** Effect of amounts of *t*BuOH on anionic polymerization of TBMA:  $[M]_0/[2]_0/[KOtBu]_0/[18\text{-crown-}6]_0/[tBuOH] = 750/30/3.0/3.3/0-9.0$  mM in THF at 0 °C.



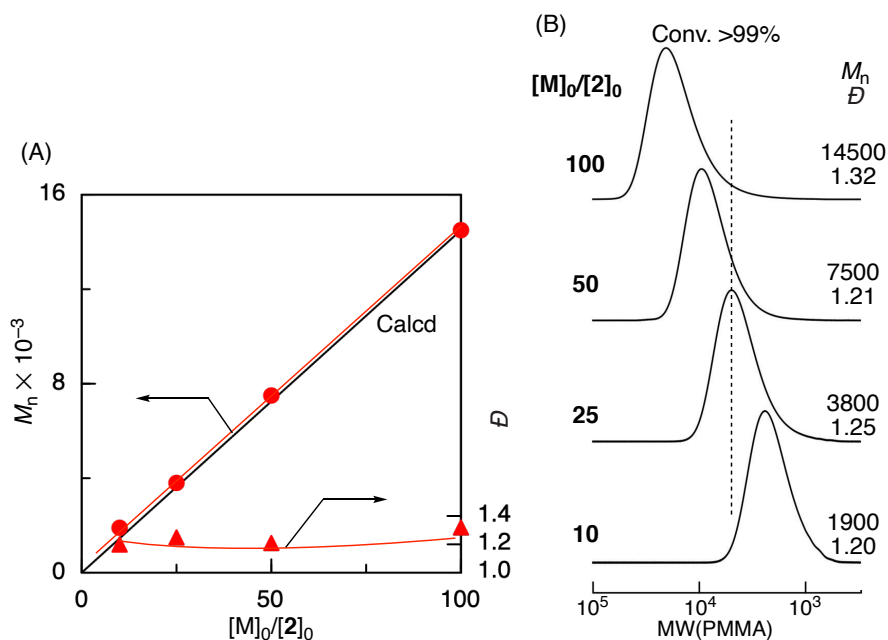

**Supplementary Fig. 9.** Effect of  $[M]_0/[2]_0$  on anionic polymerization of TBMA in the presence of *t*BuOH:  $[M]_0 = 750$  mM,  $[M]_0/[2]_0 = 10$ –100,  $[2]_0/[KOtBu]_0/[18\text{-crown-}6]_0/[tBuOH]_0 = 10/1/1.1/2$  in THF at 0 °C.

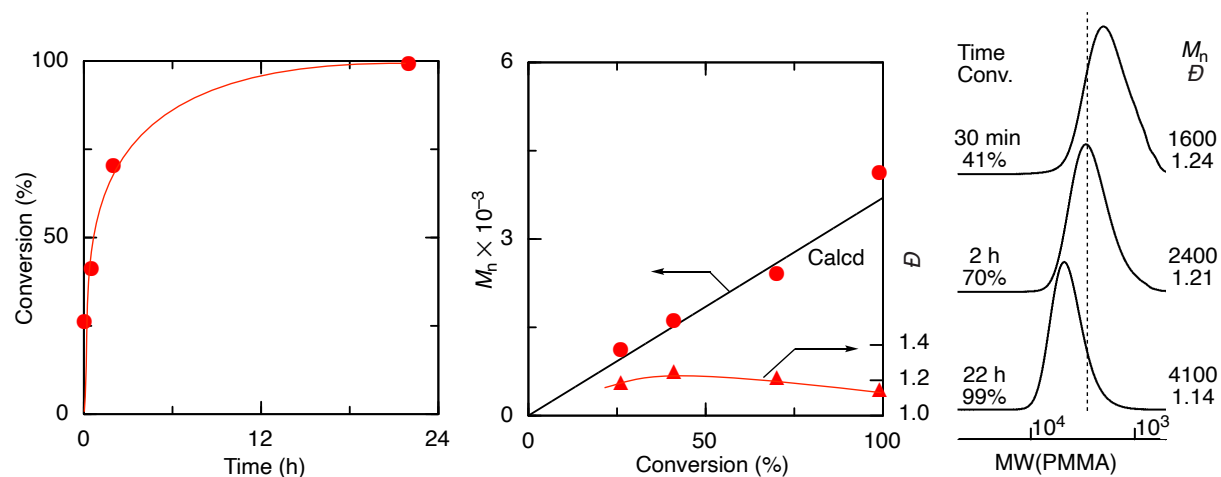

**Supplementary Fig. 10.** Anionic polymerization of TBMA using as-purchased toluene without purification:  $[M]_0/[4]_0/[KOtBu]_0/[18\text{-crown-}6]_0 = 750/30/3.0/3.3$  mM in toluene/THF (9/1 v/v) at 0 °C.

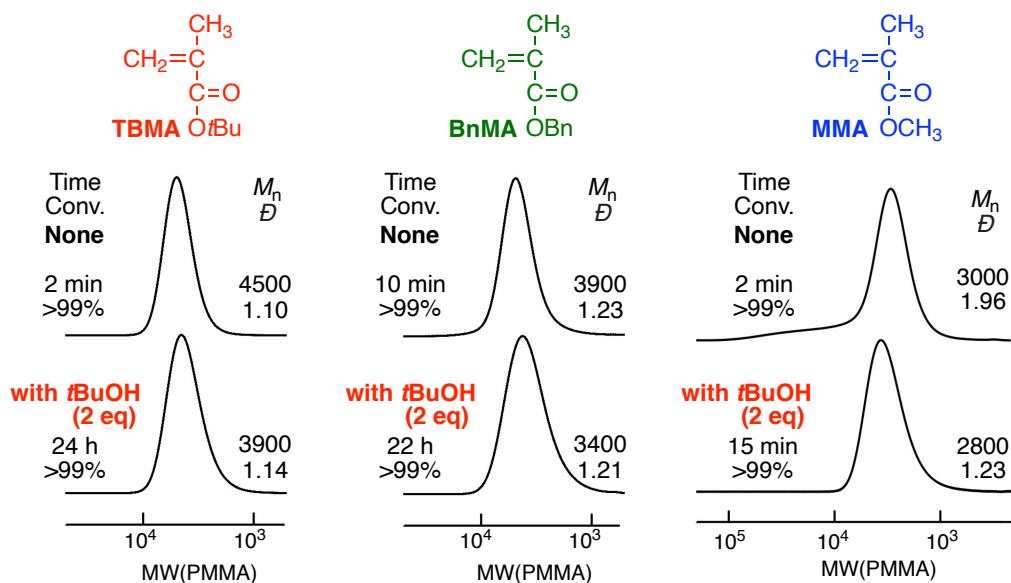

**Supplementary Fig. 11.** SEC curves of the polymers obtained by anionic polymerization of various methacrylates in the absence or presence of *t*BuOH:  $[M]_0/[4]_0/[KOtBu]_0/[18\text{-crown-}6]_0/[tBuOH]_0 = 750/30/3.0/3.3/0$  or  $6.0$  mM at  $0^\circ\text{C}$  in THF (for TBMA and BnMA) or in toluene/THF (9/1 v/v) (for MMA).

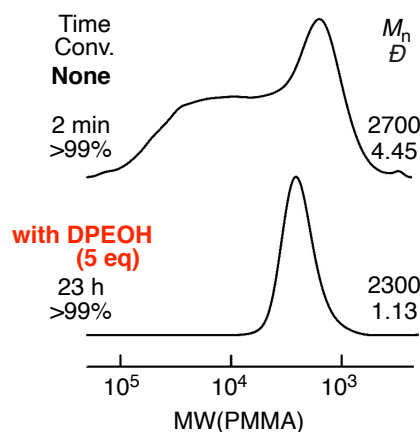

**Supplementary Fig. 12.** SEC curves of PMMA obtained by anionic polymerization using KHMDS in the absence or presence of DPEOH:  $[MMA]_0/[4]_0/[KHMDS]_0/[18\text{-crown-}6]_0/[DPEOH]_0 = 750/30/3.0/3.3/0$  or  $15$  mM in toluene/THF (9/1 v/v) at  $0^\circ\text{C}$ .

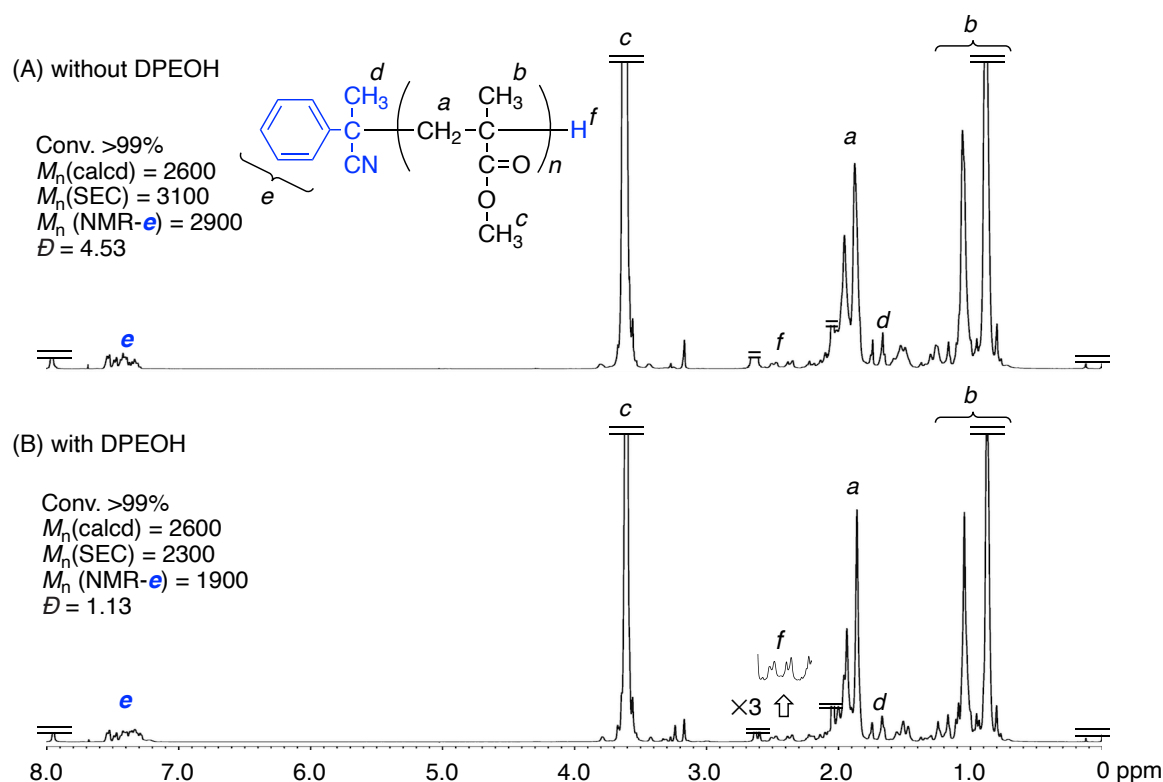

**Supplementary Fig. 13.**  $^1\text{H}$  NMR spectra ( $(\text{CD}_3)_2\text{CO}$ ,  $50\text{ }^\circ\text{C}$ ) of poly(MMA) obtained by anionic polymerization in the absence (A) or presence (B) of DPEOH.

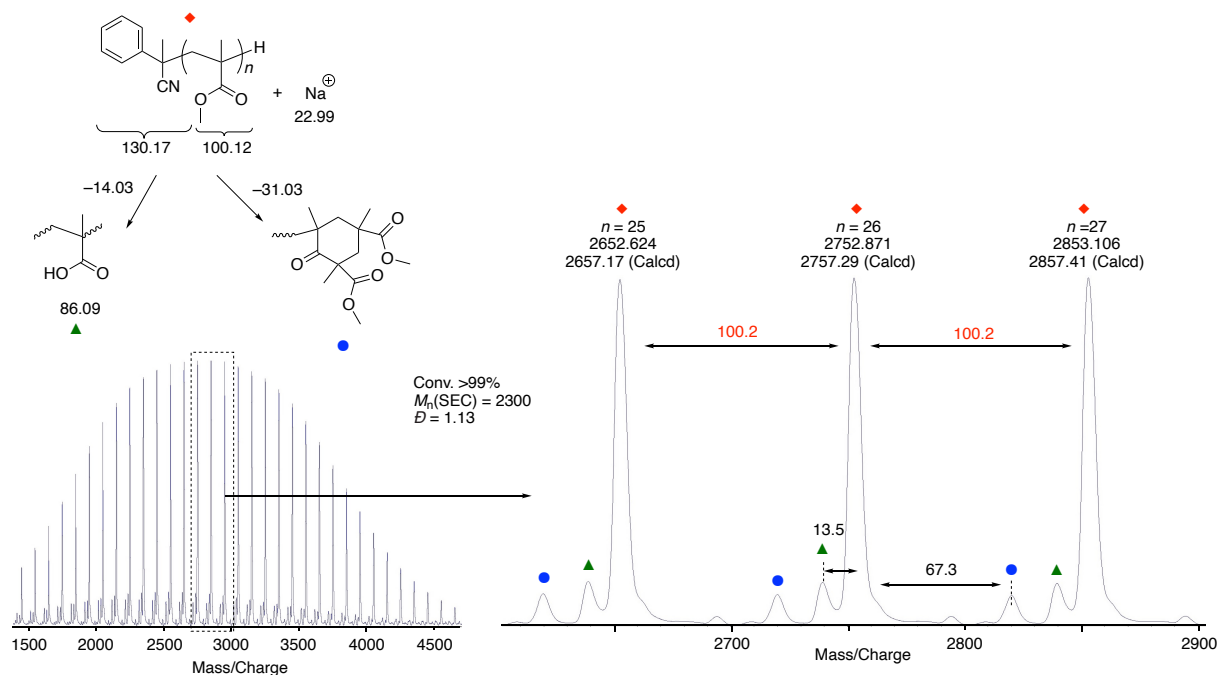

**Supplementary Fig. 14.** MALDI-TOF-MS spectrum of poly(MMA) obtained by anionic polymerization in the presence of DPEOH.

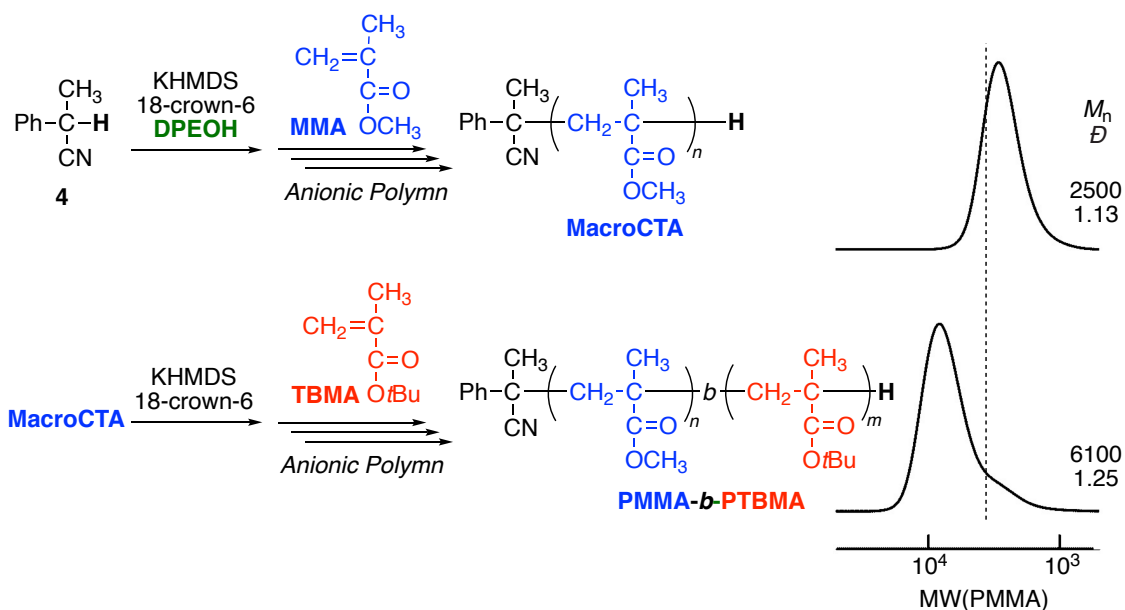

**Supplementary Fig. 15.** SEC curves of PMMA as macroCTA and poly(MMA-*b*-TBMA) obtained by anionic polymerization: [MMA]<sub>0</sub>/[**4**]<sub>0</sub>/[KHMDS]<sub>0</sub>/[18-crown-6]<sub>0</sub>/[DPEOH]<sub>0</sub> = 750/30/3.0/3.3/6.0 mM in toluene/THF (9/1 v/v) at 0 °C. [TBMA]<sub>0</sub>/[macroCTA]<sub>0</sub>/[KHMDS]<sub>0</sub>/[18-crown-6]<sub>0</sub> = 750/30/3.0/3.3/6.0 mM in toluene/THF (9/1 v/v) at 0 °C.

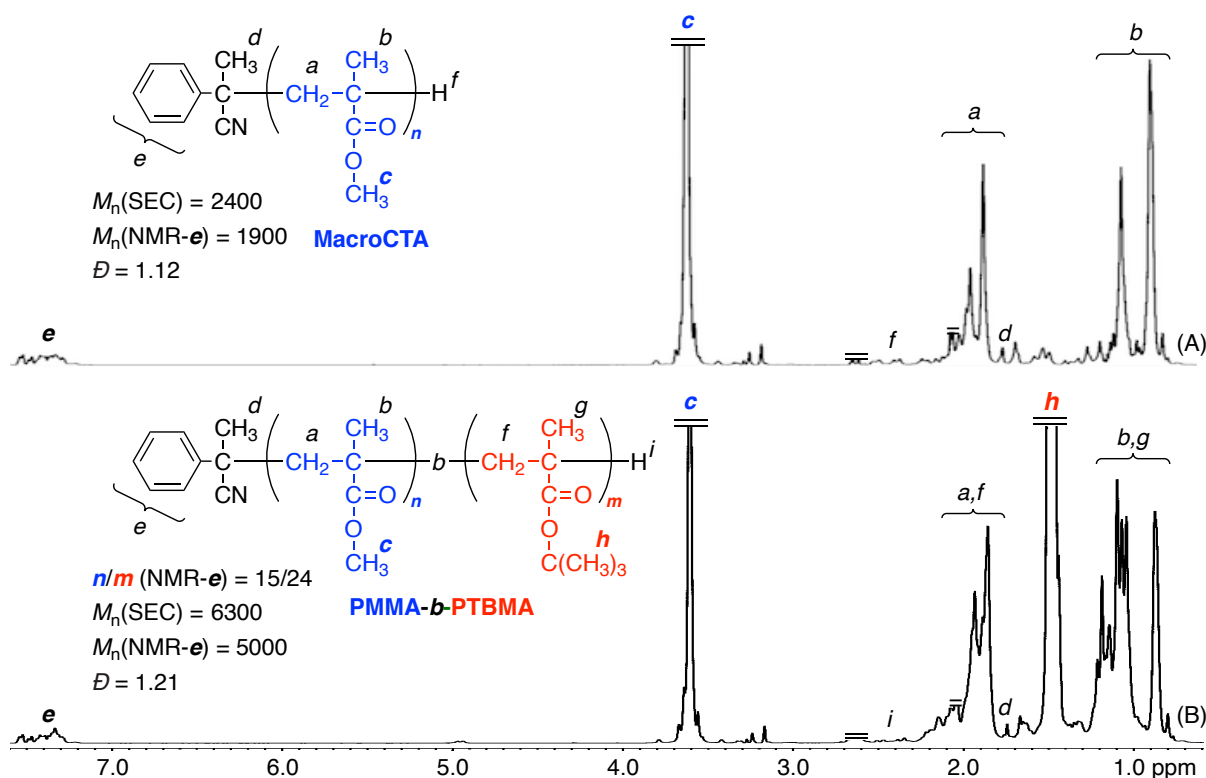

**Supplementary Fig. 16.** <sup>1</sup>H NMR spectra ((CD<sub>3</sub>)<sub>2</sub>CO, 50 °C) of poly(MMA) obtained from **4** (A) and poly(MMA-*b*-TBMA) obtained from the PMMA as macroCTA (B).

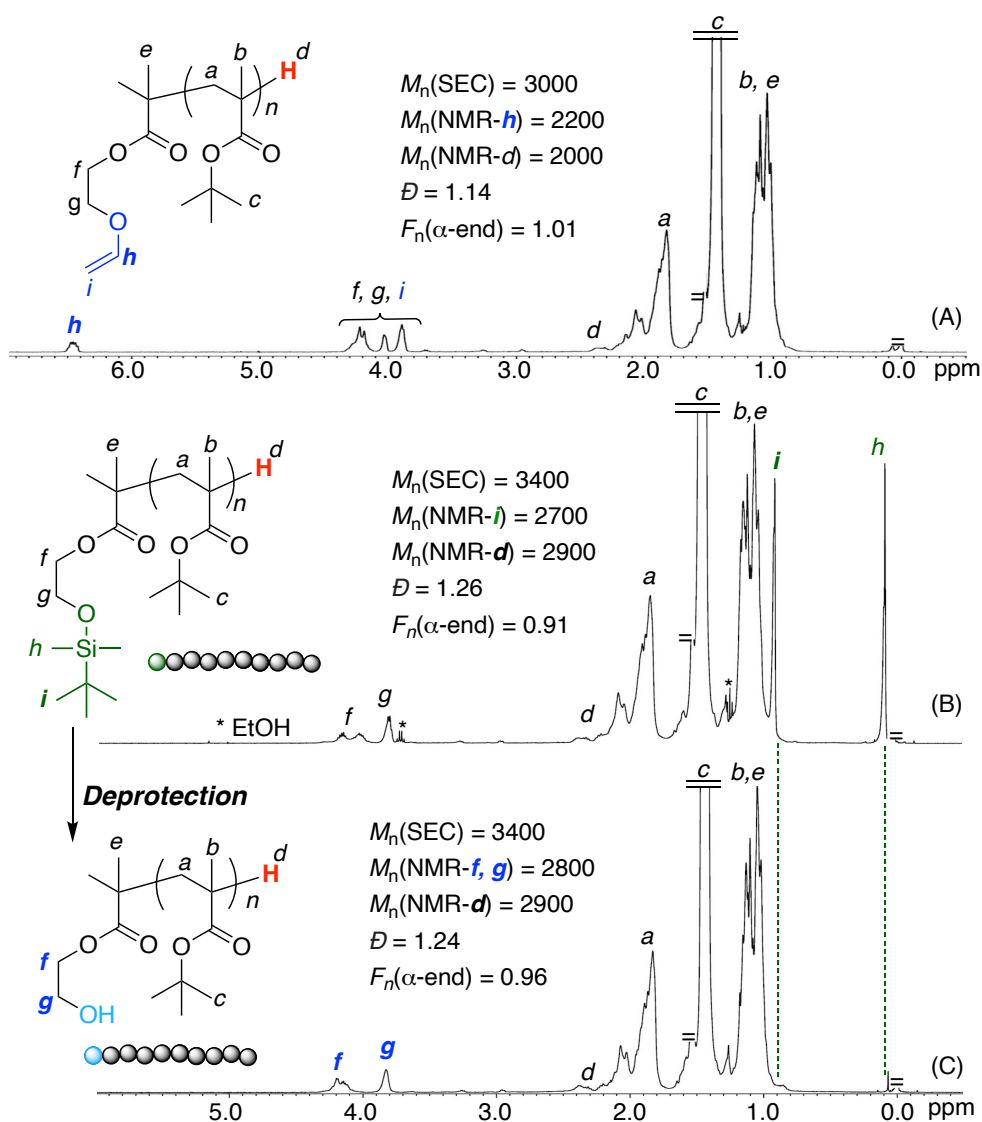

**Supplementary Fig. 17.**  $^1\text{H}$  NMR spectra ( $\text{CDCl}_3$ ,  $55^\circ\text{C}$ ) of end-functionalized poly(TBMA) obtained by anionic polymerization using **5** (A) and **6** (B) and by subsequent deprotection of silyl group (C).

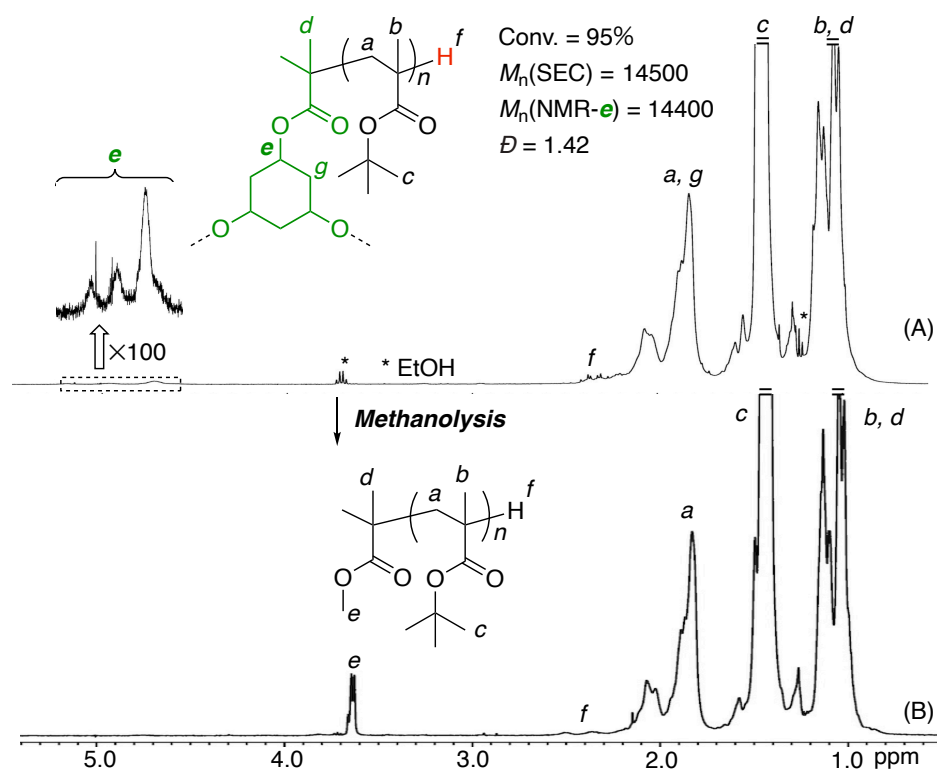

**Supplementary Fig. 18.**  $^1\text{H}$  NMR spectra ( $\text{CDCl}_3$ ,  $55^\circ\text{C}$ ) of star poly(TBMA) obtained by anionic polymerization using 7 (A) and the polymer obtained after methanolysis (B).

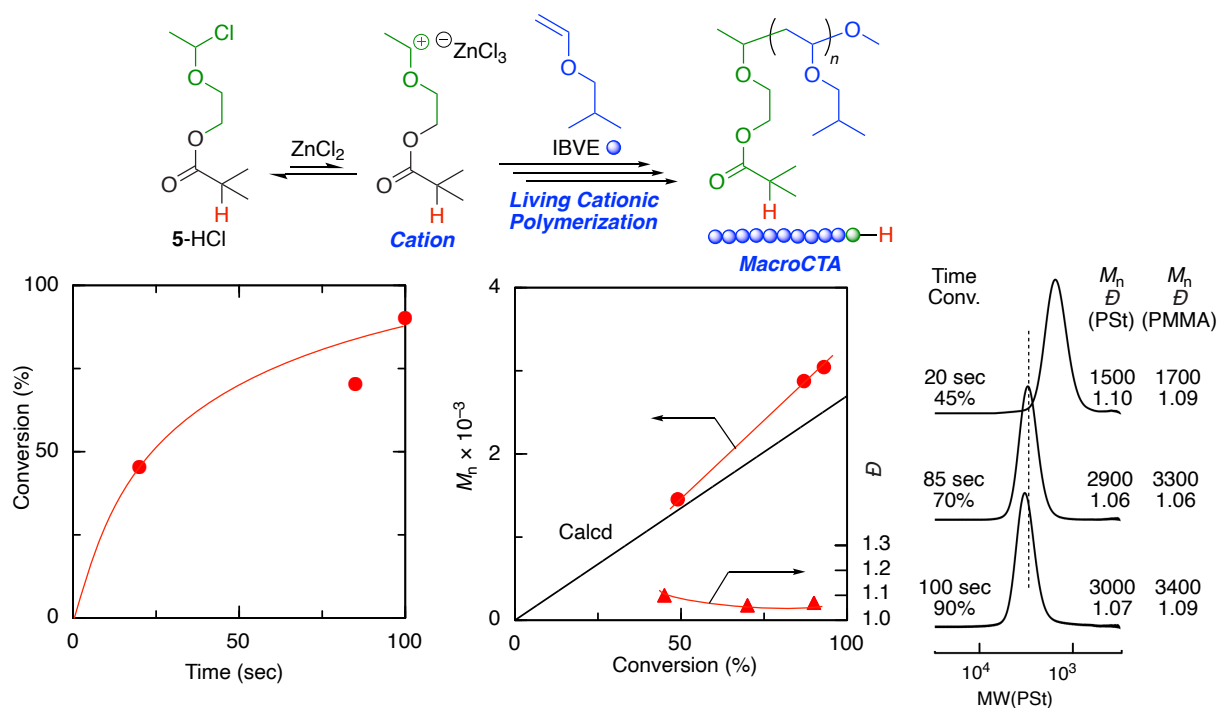

**Supplementary Fig. 19.** Living cationic polymerization of IBVE using HCl adduct of 5 (5-HCl) as an initiator:  $[\text{IBVE}]_0/[\text{5-HCl}]_0/[\text{ZnCl}_2]_0 = 500/20/2.0$  mM in toluene/ $\text{Et}_2\text{O}$  (9/1 v/v) at  $0^\circ\text{C}$ .

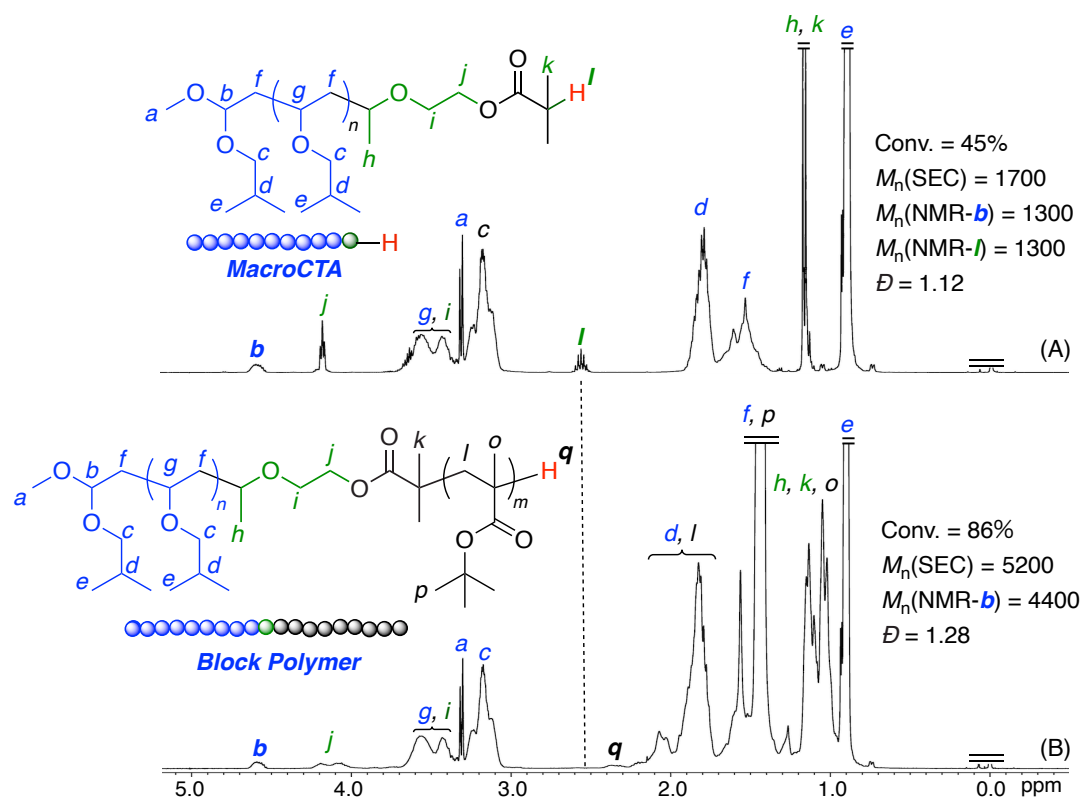

**Supplementary Fig. 20.**  $^1\text{H}$  NMR spectra (CDCl<sub>3</sub>, 55 °C) of poly(IBVE) obtained by living cationic polymerization of IBVE using **5**-HCl (A) and poly(IBVE-*b*-TBMA) obtained by anionic polymerization of TBMA using the poly(IBVE) as macroCTA (B).

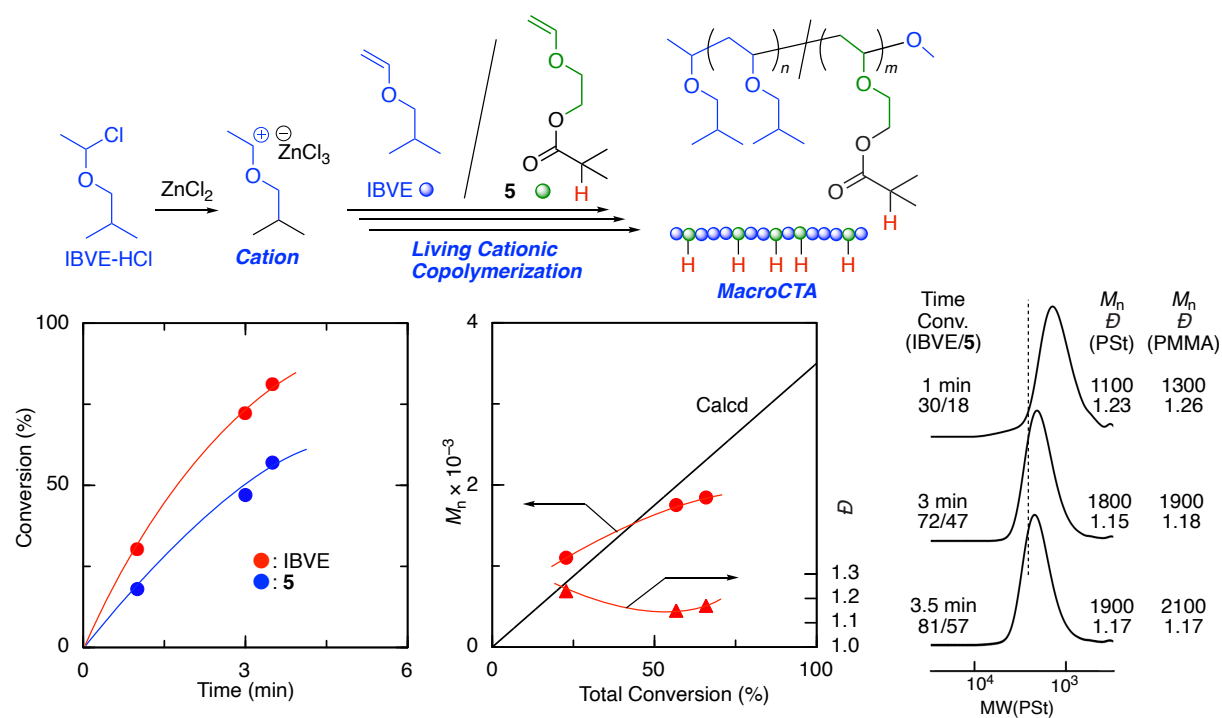

**Supplementary Fig. 21.** Living cationic copolymerization of IBVE and **5**:  $[\text{IBVE}]_0/[\text{5}]_0/[\text{IBVE-HCl}]_0/[\text{ZnCl}_2]_0 = 260/260/20/2.0$  mM in toluene/Et<sub>2</sub>O (9/1 v/v) at 0 °C.

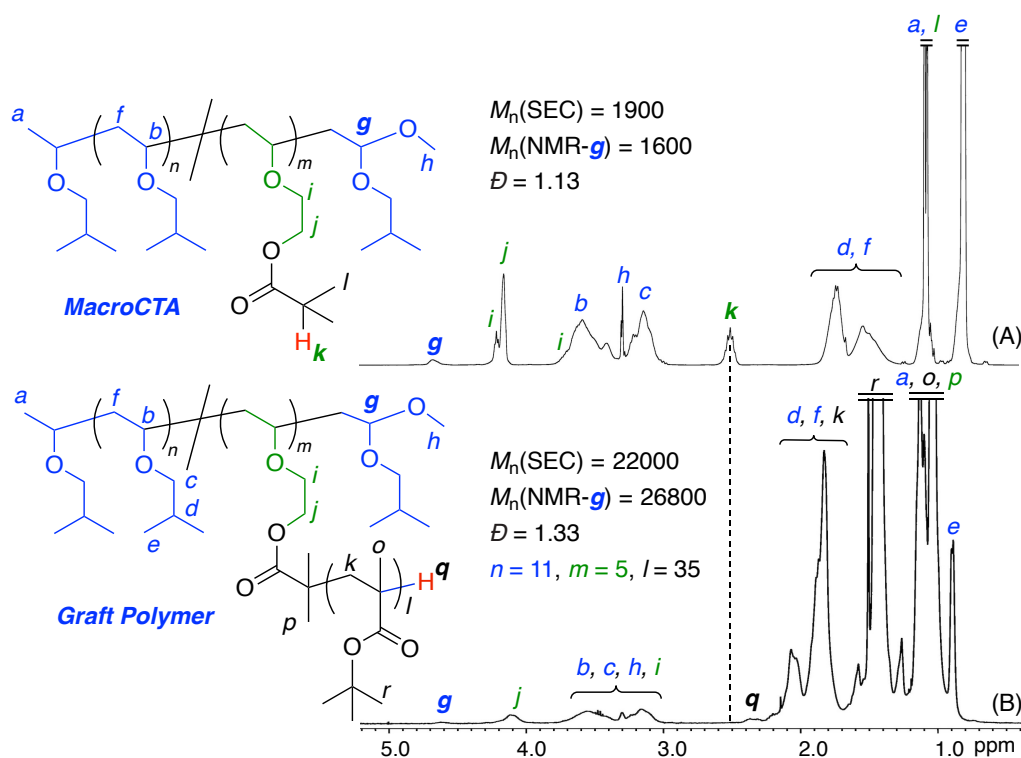

**Supplementary Fig. 22.**  $^1\text{H}$  NMR spectra (CDCl<sub>3</sub>, 55 °C) of poly(IBVE-*co*-5) obtained by living cationic copolymerization of IBVE and **5** (A) and poly(IBVE-*g*-TBMA) by anionic polymerization of TBMA using the poly(IBVE-*co*-5) as macroCTA (B).

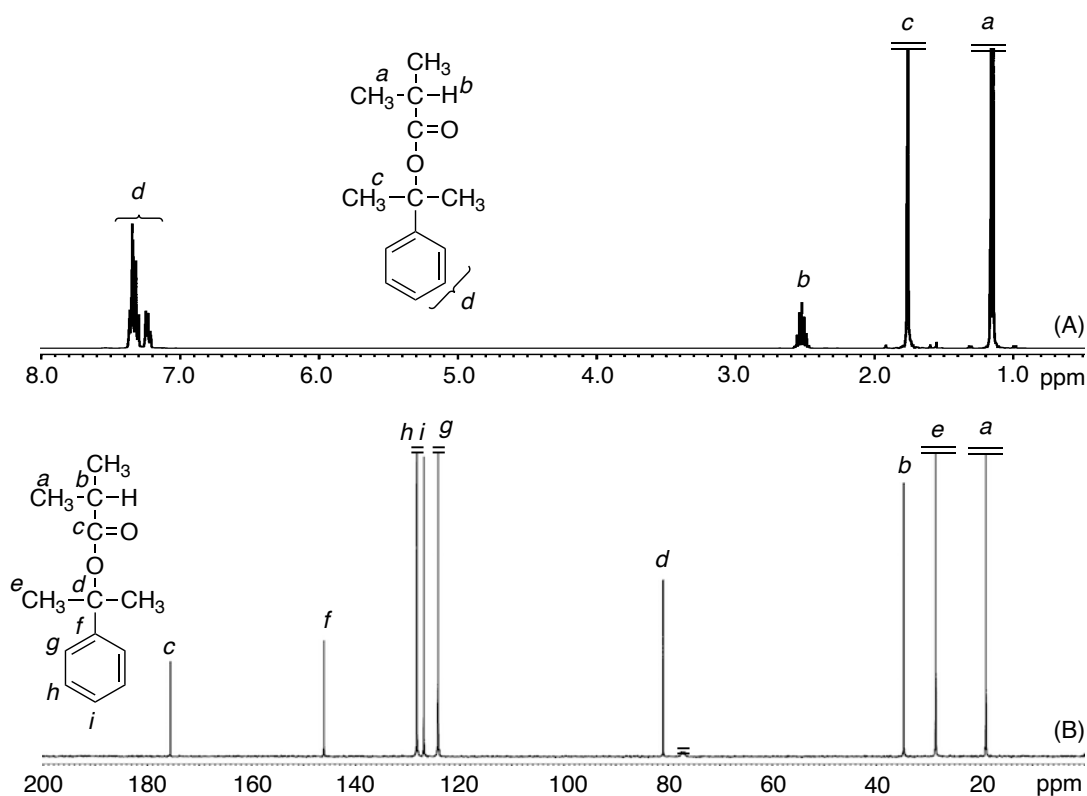

**Supplementary Fig. 23.**  $^1\text{H}$  and  $^{13}\text{C}$  spectra (CDCl<sub>3</sub>, r.t.) of **2**.



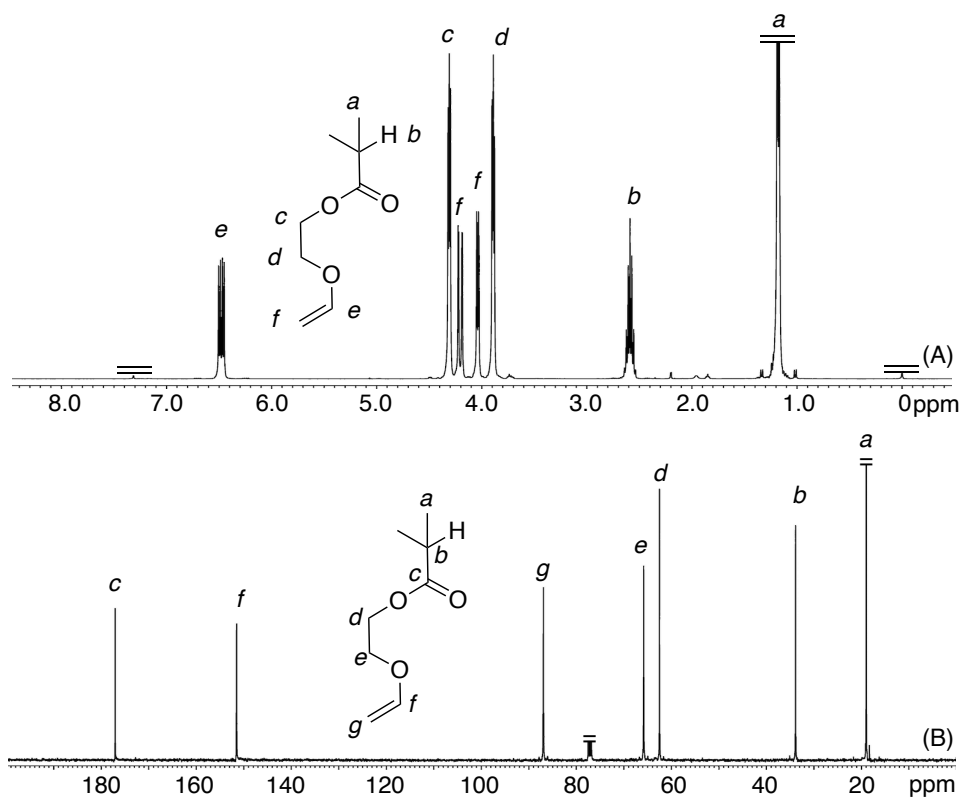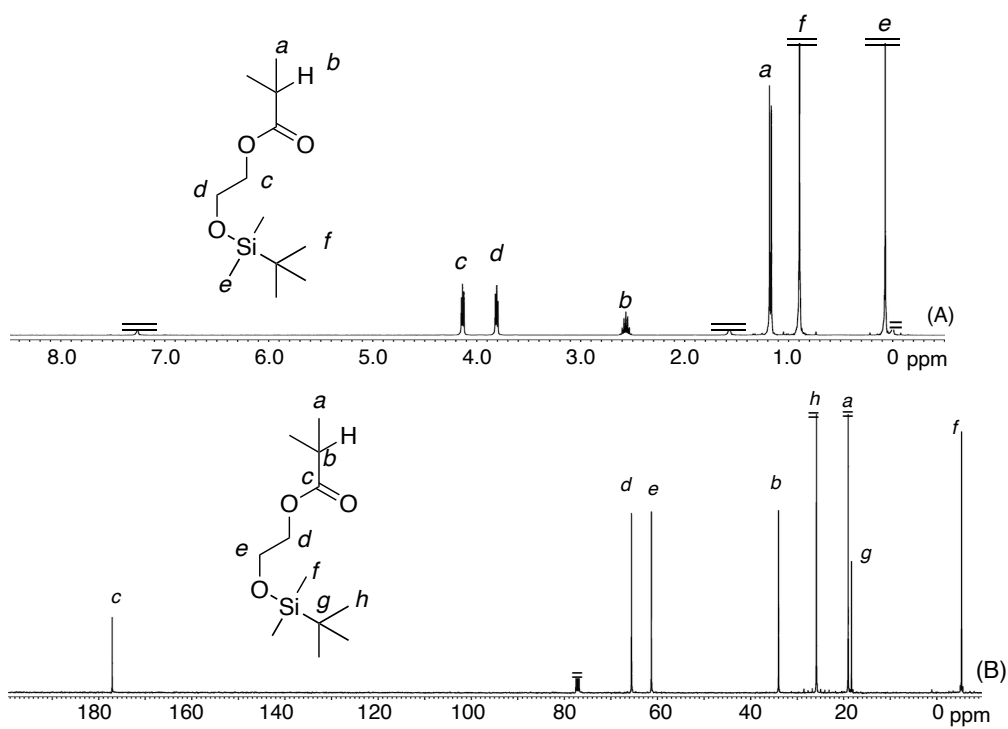

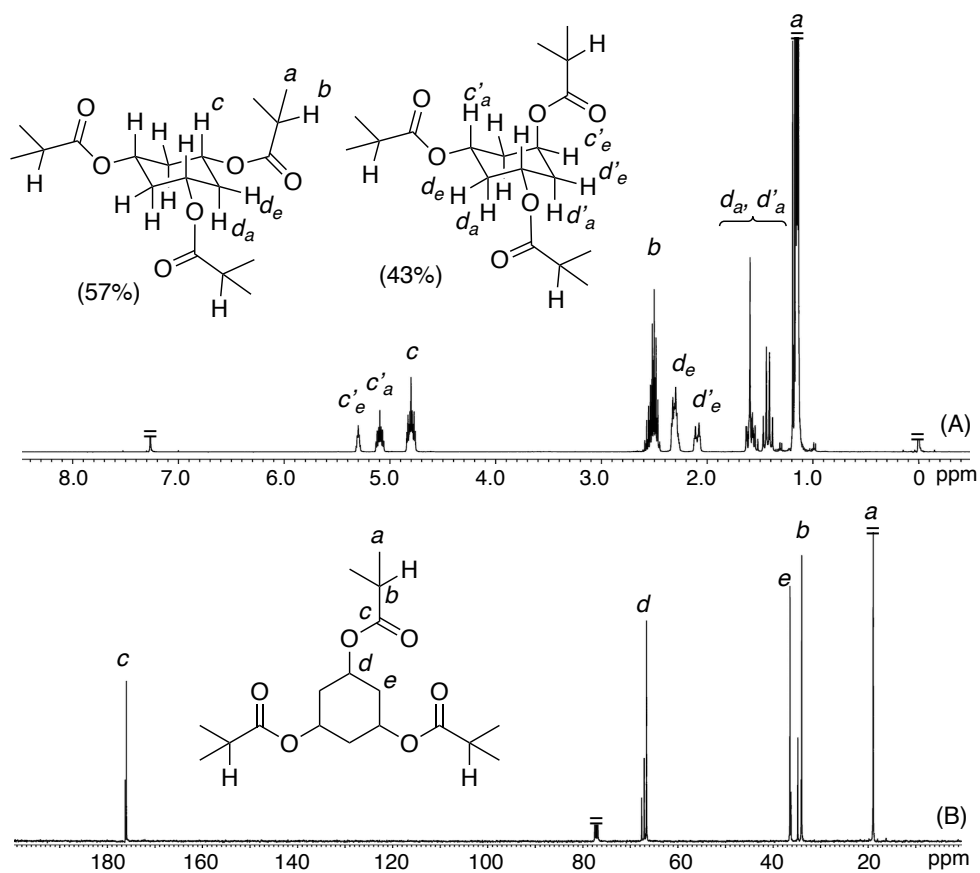

**Supplementary Fig. 26.**  $^1\text{H}$  and  $^{13}\text{C}$  spectra ( $\text{CDCl}_3$ , r.t.) of **7**.

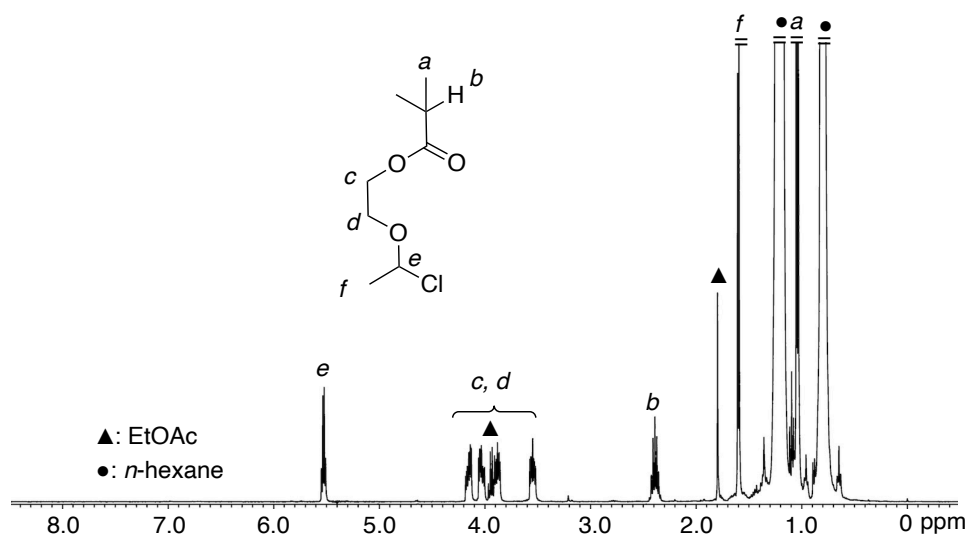

**Supplementary Fig. 27.**  $^1\text{H}$  spectrum ( $(\text{CD}_3)_2\text{CO}$ , r.t.) of HCl adduct of **5**.
